# Supplementary material for: Targeted pH/redox dual-responsive nanoparticles for cancer chemotherapy combined with photodynamic/photothermal therapy
Source: Royal Society of Chemistry journal article supplement (doi:10.1039/d1nj06134h), 2022-01-01
Supplement: d1nj06134h1.pdf [file d1nj06134h1.pdf]

## Electronic Supplementary Information (ESI)

### **Targeted pH/redox dual-responsive nanoparticles for cancer chemotherapy combined with photodynamic/photothermal therapy**

Chaohua Li,<sup>†a</sup> Cong Chang,<sup>†b</sup> Xuelian Wang,<sup>b</sup> Qingni Xu,<sup>a</sup> Yuqi Chen,<sup>a</sup>

Yueli Zhang,<sup>a</sup> Mengqi Yi,<sup>a</sup> Yuyang Li,<sup>a</sup> Bei Xiong,<sup>a</sup> Bo Lu,<sup>\*a</sup>

<sup>a</sup>: School of Chemistry, Chemical Engineering and Life Sciences, Wuhan University of Technology, Wuhan, 430070, PR China. Email: lvb@whut.edu.cn

<sup>b</sup>: College of Pharmacy, Hubei University of Chinese Medicine, Wuhan, PR China.

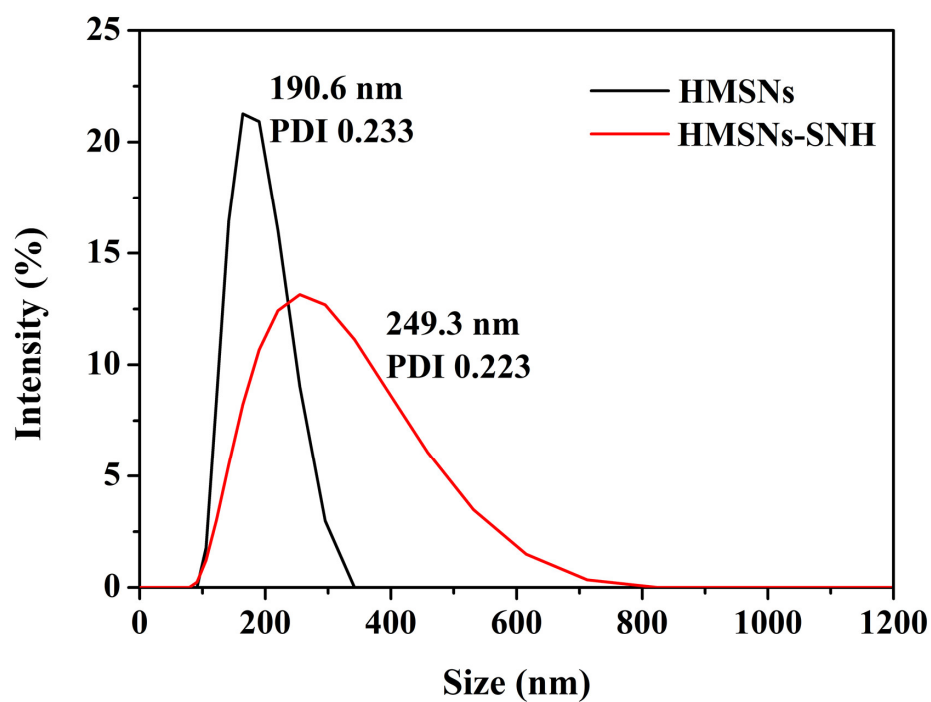

Fig. S1. Hydrodynamic diameters distribution of HMSNs and HMSNs-SNH.

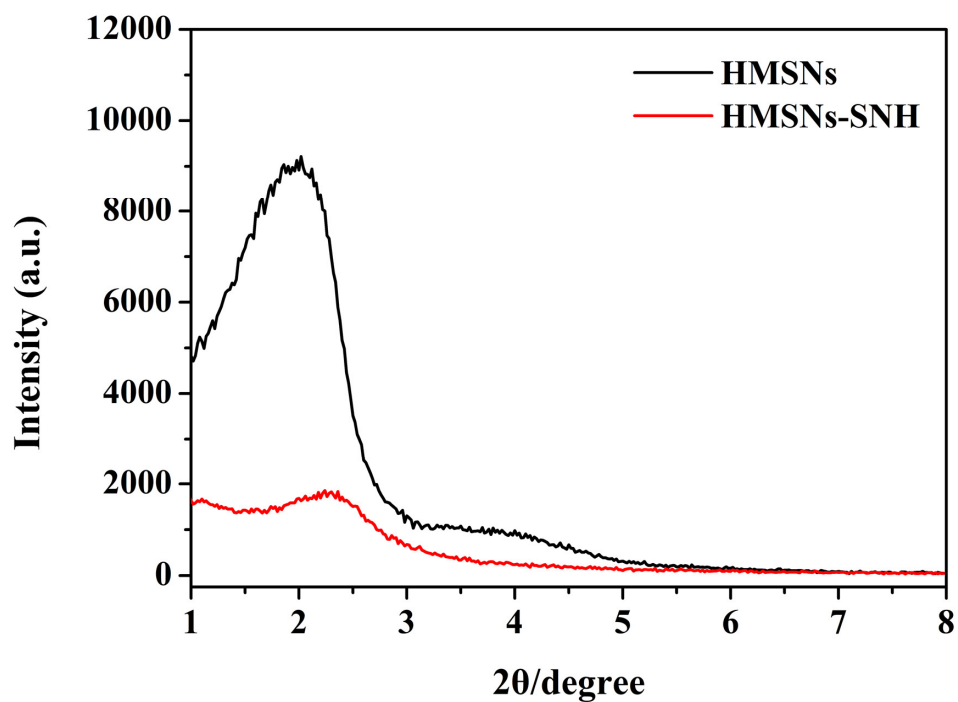

Fig. S2. XRD spectra of HMSNs and HMSNs-SNH.

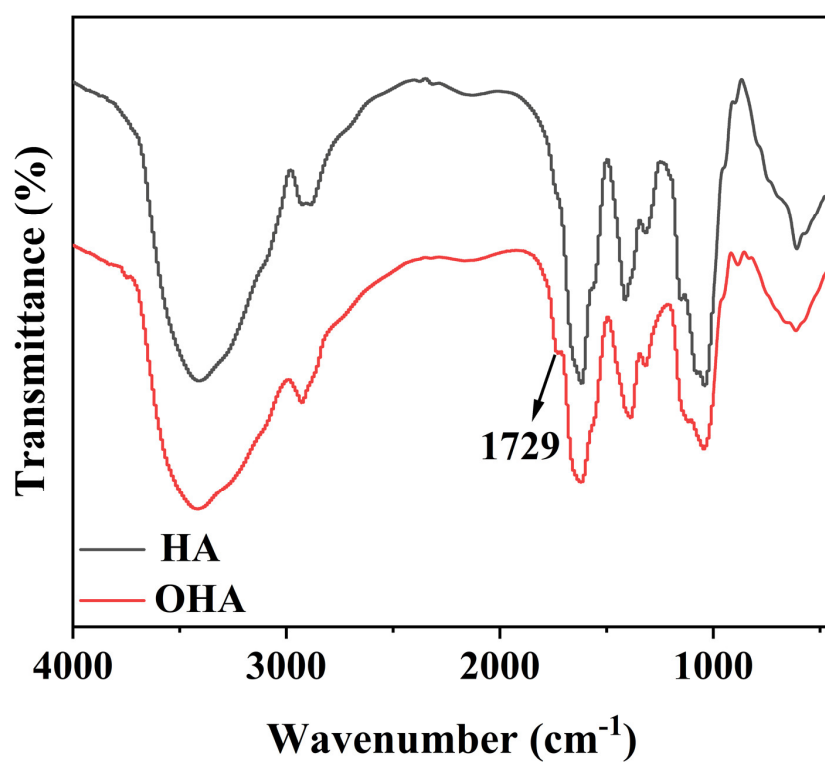

Fig. S3. FTIR spectra of HA and OHA.

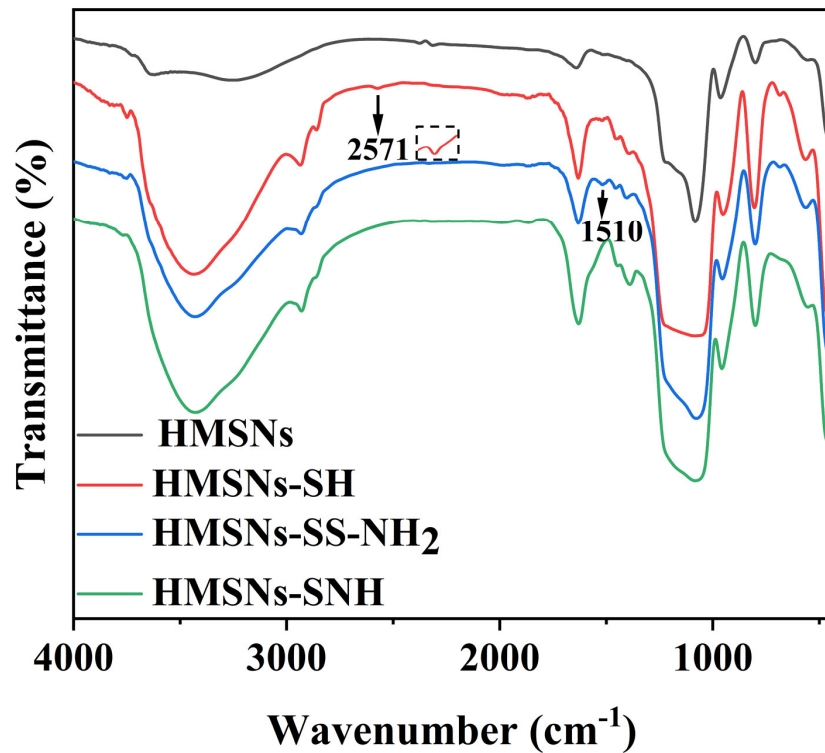

Fig. S4. FTIR spectra of HMSNs, HMSNs-SH, HMSNs-SS-NH<sub>2</sub> and HMSNs-SNH.

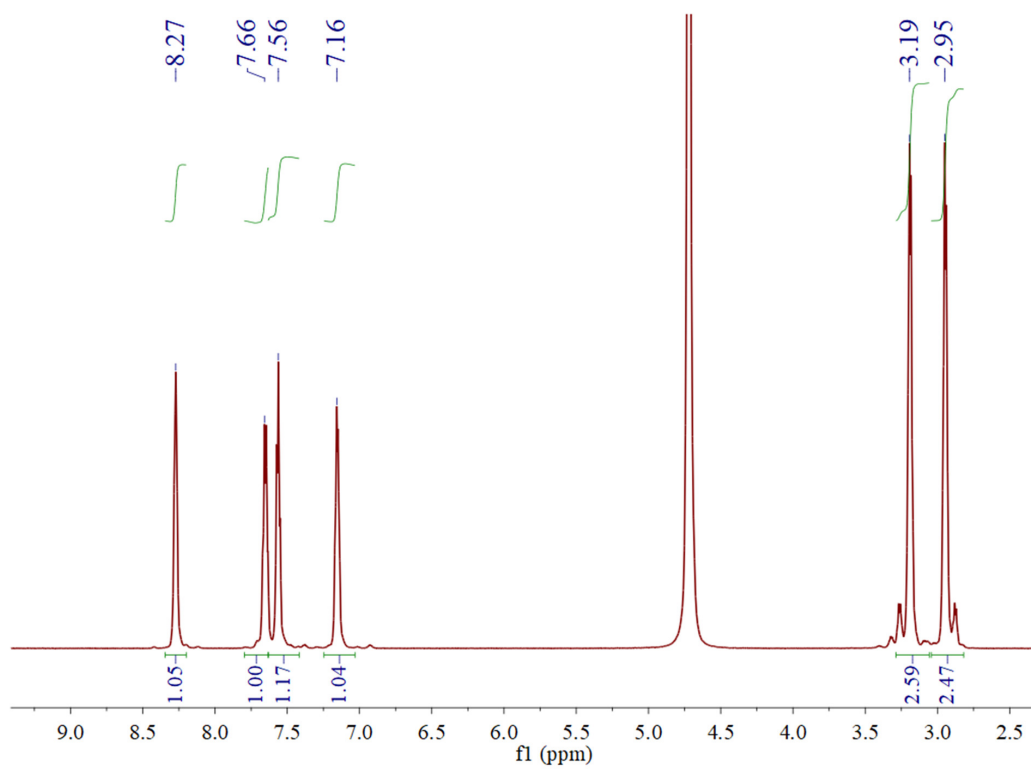

**Fig. S5.**  $^1\text{H}$  NMR spectra of Py-SS-NH<sub>2</sub>.

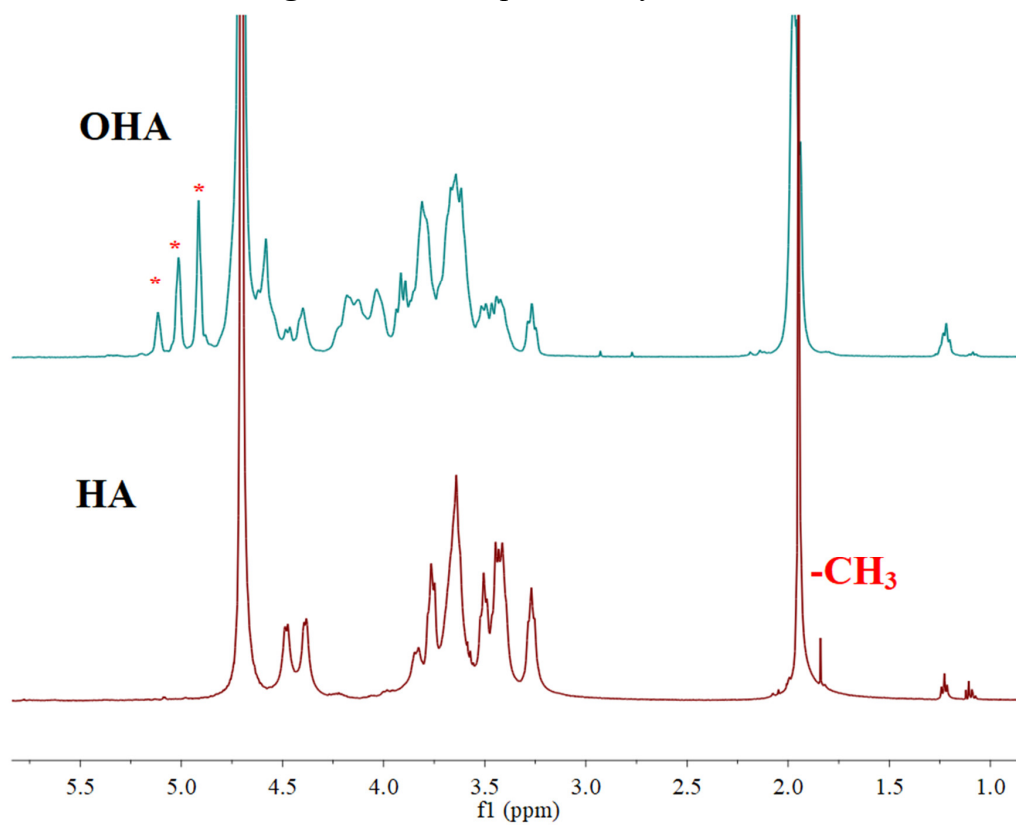

**Fig. S6.**  $^1\text{H}$  NMR spectra of HA and OHA.

**Table S1.** BET and BJH parameter values of various HMSNs.

| Sample                          | BET surface area<br>$S_{\text{BET}}$ (m <sup>2</sup> /g) | BJH pore volume<br>$V_{\text{P}}$ (cm <sup>3</sup> /g) | BJH pore diameter<br>$V_{\text{BJH}}$ (nm) |
|---------------------------------|----------------------------------------------------------|--------------------------------------------------------|--------------------------------------------|
| HMSNs                           | 1036.56                                                  | 1.04                                                   | 4.03                                       |
| ID@HMSNs-SS-<br>NH <sub>2</sub> | 622.48                                                   | 0.70                                                   | 4.40                                       |
| ID@HMSNs-SNH                    | 9.90                                                     | 0.16                                                   | /                                          |

**Table S2.** IC<sub>50</sub> values of various samples in HepG2 cells after 24 h.

|       | DOX<br>( $\mu\text{g/mL}$ ) | DOX@HMSNs-SNH<br>( $\mu\text{g/mL}$ ) | DOX+ICG<br>( $\mu\text{g/mL}$ ) | ID@HMSNs-SNH<br>( $\mu\text{g/mL}$ ) |
|-------|-----------------------------|---------------------------------------|---------------------------------|--------------------------------------|
| Dark  | 1.12                        | 0.39                                  | 1.10                            | 0.30                                 |
| Laser | 1.31                        | 0.42                                  | 0.36                            | 0.09                                 |
