# Supplementary figures and images for: Targeted pH/redox dual-responsive nanoparticles for cancer chemotherapy combined with photodynamic/photothermal therapy
Source: Royal Society of Chemistry journal article supplement (doi:10.1039/d1nj06134h), 2022-01-01

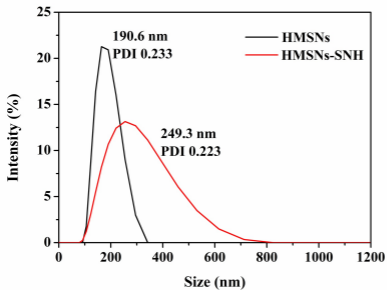

Supplement: d1nj06134h3.pdf [file d1nj06134h3.pdf]

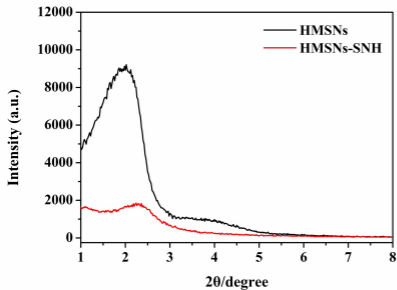

Supplement: d1nj06134h4.pdf [file d1nj06134h4.pdf]

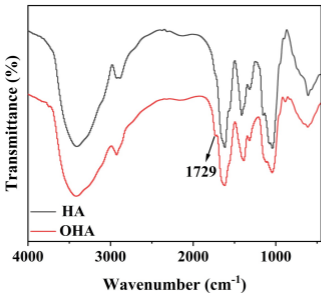

Supplement: d1nj06134h5.pdf [file d1nj06134h5.pdf]

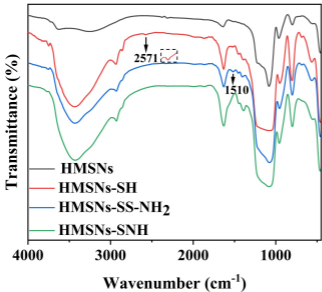

Supplement: d1nj06134h6.pdf [file d1nj06134h6.pdf]

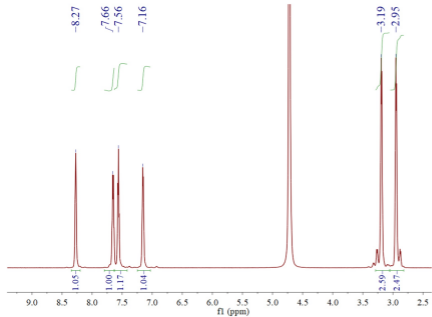

Supplement: d1nj06134h7.pdf [file d1nj06134h7.pdf]

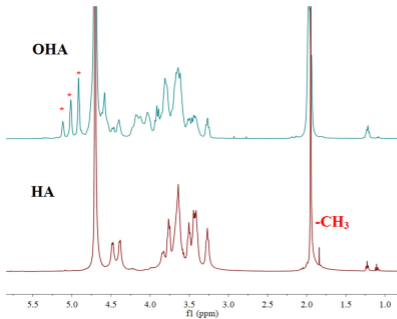

Supplement: d1nj06134h8.pdf [file d1nj06134h8.pdf]
